# Supplementary material
Source: MDPI journal article supplement (https://www.mdpi.com/2071-1050/13/21/12216)
Supplement: s1 [file s1 › Table S1.pdf]

**Table S1.** List of the 37 selected statements included in the Q-set. Columns on the right are the composite Q-sorts with their significance level in each factor. F1-F4: significant factors (discourses) selected from the analysis (see text for factor names). \* =  $p < 0.05$ , \*\* =  $p < 0.01$ . C = consensus statements.

| no. | Statement                                                                                                                                                                 | F1    | F2    | F3    | F4    |   |
|-----|---------------------------------------------------------------------------------------------------------------------------------------------------------------------------|-------|-------|-------|-------|---|
| 1   | A transplantation technique that is considered the most appropriate to the transplant site should be adopted                                                              | 3     | 2     | -3 ** | 1     |   |
| 2   | The information that leads to choose the transplantation as a compensation measure should be clear and easily accessible                                                  | 2     | 2     | -3 ** | 0     |   |
| 3   | A mismatch between administrative and technical terminology exists in the EIA prescriptions that impose the transplantation                                               | -2    | 0 *   | -2    | 1 **  |   |
| 4   | The choice of the transplantation technique should be based on an accurate environmental study of the transplant site                                                     | 3     | 2     | 0 *   | 2     |   |
| 5   | A marine protected area should be established in addition to the transplantation to assure the full restoration of ecosystem functions lost due the infrastructural works | 0     | 0     | 3 **  | 0     |   |
| 6   | <i>P. oceanica</i> transplantations are not a priority for the country                                                                                                    | -2    | 1     | 2     | -3    |   |
| 7   | Among compensation measures, public meetings should be held to awaken the public opinion to conservation and environmental issues                                         | -1 ** | -3 ** | 1     | 3     |   |
| 8   | The choice of the transplantation technique should be based on the most recent scientific knowledge                                                                       | 2     | 4 **  | 2     | 2     |   |
| 9   | Social acceptance of the infrastructural works and of the compensation measures is a prerequisite to a good governance of the transplantation initiative                  | -1 ** | 3 *   | 2 *   | 0 *   |   |
| 10  | <i>P. oceanica</i> should be protected, not transplanted                                                                                                                  | 1 **  | 0     | 4 **  | -2    |   |
| 11  | <i>P. oceanica</i> is a waste                                                                                                                                             | -4    | -1 ** | -4    | -4    |   |
| 12  | A transplantation initiative should involve local skills, abilities, and cultural heritage                                                                                | -1    | 0     | 0     | -1    |   |
| 13  | Pilot transplantations should be realized in the identified transplant site before the start of the infrastructural works                                                 | 3 **  | 1     | 0     | 0     |   |
| 14  | Monitoring outputs should be made public in an easily accessible and understandable format                                                                                | 1     | 1     | 1     | 2     | C |
| 15  | A transplantation should produce easily accessible new knowledge and data                                                                                                 | 0     | 0     | 2 *   | 3 *   |   |
| 16  | Maritime infrastructural works are necessary to the economic growth of the country                                                                                        | -3    | 3 **  | -3    | -1 ** |   |
| 17  | Priority habitats as defined by the EC Habitat Directive should never be impacted by infrastructural works                                                                | 2     | -4 ** | 3     | -2 ** |   |
| 18  | The environmental effects of a transplantation should be made public                                                                                                      | -2 *  | 0     | 3     | 1     |   |
| 19  | EIA prescriptions should be drawn up by a multidisciplinary expert team                                                                                                   | 1     | -3 ** | -1    | 0     |   |
| 20  | Transplantations should be bound to the stakeholders' acceptance                                                                                                          | -2    | -3    | 1 **  | -2    |   |
| 21  | The main aim of EIA should be ecosystem protection                                                                                                                        | 4 **  | -2 ** | 1     | 3     |   |
| 22  | Transplantations should always be realized by an experienced team                                                                                                         | 2     | 2     | -1 ** | 2     |   |
| 23  | A transplant alone cannot warrant all the ecosystem functions originally provided by the damaged seagrass meadow                                                          | 1     | -1    | 2     | -2    |   |
| 24  | The restoration of lost ecosystem functions is more important than economic convenience in the choice of transplantation technique                                        | 1     | -1 ** | 1     | 2     |   |
| 25  | Tenders for the allotment of a transplantation initiative should not be based solely on a lowest-bid contract                                                             | 0     | 3 **  | 0     | 1     |   |
| 26  | Economic development should not be subject to extreme conservation logics                                                                                                 | -3 ** | 2 **  | -1    | -1    |   |
| 27  | The citizens should be fully informed about objectives, techniques, and costs of a transplantation initiative during its early stages, not merely after its completion    | 0     | 0     | 0     | 0     | C |
| 28  | Links and synergies among the stakeholders directly involved in a transplantation initiative are insufficient                                                             | 0 *   | -1    | -2    | 0 *   |   |
| 29  | Transplantation initiatives should be fully regulated                                                                                                                     | 0     | -2    | -1    | -1    | C |
| 30  | The governance of a transplantation initiative should be adapted to the local socio-economic context                                                                      | -1    | 1 **  | -2    | -2    |   |
| 31  | Transplant monitoring should be carried out by an external scientific team rather than by the one who realized the transplant                                             | 1     | -2 ** | 0     | 1     |   |

|    |                                                                                                                                     |     |      |     |      |   |
|----|-------------------------------------------------------------------------------------------------------------------------------------|-----|------|-----|------|---|
| 32 | The creation of centers for the collection and storage of beach-cast rhizomes and seeds of <i>P. oceanica</i> is a priority         | -1  | -2   | -2  | -1   |   |
| 33 | Transplant monitoring should be a long-term activity                                                                                | 2 * | -1   | 1 * | -1   |   |
| 34 | The data collected before and after realized transplantations are not adequately organized, shared, and exploited                   | 0   | -1   | -1  | 1 *  |   |
| 35 | The loss of <i>P. oceanica</i> meadows is an inevitable cost of modernization                                                       | -3  | -2   | -2  | -3   | C |
| 36 | To avoid tensions, transplantation initiatives should be based on the agreement of all (national, regional, local) political actors | -2  | 1 ** | -1  | -3 * |   |
| 37 | All steps of a transplantation initiative should be traceable, clear, and accessible                                                | -1  | 1    | 0   | 4 ** |   |
