# Supplementary material
Source: MDPI journal article supplement (https://www.mdpi.com/2071-1050/13/21/12216)
Supplement: s1 [file s1 › Table S2.pdf]

**Table S2.** Z-score of statements and associated rank in each significant factor (F1, F2, F3, F4).

| Statement no. | F1      |      | F2      |      | F3      |      | F4      |      |
|---------------|---------|------|---------|------|---------|------|---------|------|
|               | Z-score | Rank | Z-score | Rank | Z-score | Rank | Z-score | Rank |
| 1             | 1.47    | 3    | 1.11    | 7    | -1.19   | 34   | 0.66    | 10   |
| 2             | 0.86    | 9    | 0.97    | 9    | -1.37   | 35   | 0.32    | 18   |
| 3             | -0.99   | 33   | -0.22   | 20   | -0.95   | 30   | 0.65    | 11   |
| 4             | 1.49    | 2    | 1.14    | 6    | -0.08   | 21   | 0.75    | 8    |
| 5             | -0.09   | 18   | -0.38   | 22   | 1.71    | 2    | 0.32    | 19   |
| 6             | -0.97   | 32   | 0.97    | 10   | 0.95    | 6    | -1.49   | 34   |
| 7             | -0.34   | 25   | -1.59   | 36   | 0.57    | 13   | 1.12    | 4    |
| 8             | 1.07    | 7    | 1.9     | 1    | 0.8     | 8    | 0.91    | 7    |
| 9             | -0.58   | 28   | 1.69    | 3    | 0.96    | 5    | 0.2     | 21   |
| 10            | 0.45    | 12   | -0.3    | 21   | 2.24    | 1    | -0.86   | 30   |
| 11            | -2.25   | 37   | -0.67   | 24   | -2.27   | 37   | -2.78   | 37   |
| 12            | -0.52   | 27   | 0.13    | 16   | 0.36    | 17   | -0.62   | 28   |
| 13            | 1.36    | 4    | 0.28    | 13   | 0.1     | 19   | 0.42    | 17   |
| 14            | 0.36    | 13   | 0.5     | 12   | 0.5     | 14   | 1.02    | 5    |
| 15            | 0       | 16   | 0.02    | 17   | 0.69    | 9    | 1.44    | 2    |
| 16            | -1.49   | 35   | 1.84    | 2    | -1.73   | 36   | -0.54   | 27   |
| 17            | 1.23    | 5    | -1.6    | 37   | 1.54    | 3    | -0.68   | 29   |
| 18            | -0.6    | 29   | -0.05   | 18   | 1.09    | 4    | 0.5     | 13   |
| 19            | 0.11    | 15   | -1.38   | 35   | -0.19   | 23   | -0.08   | 22   |
| 20            | -0.76   | 30   | -1.11   | 34   | 0.44    | 15   | -1.26   | 32   |
| 21            | 2.14    | 1    | -1.09   | 33   | 0.62    | 10   | 1.21    | 3    |
| 22            | 0.91    | 8    | 1.04    | 8    | -0.25   | 24   | 0.7     | 9    |
| 23            | 0.84    | 11   | -0.71   | 25   | 0.83    | 7    | -1.14   | 31   |
| 24            | 0.85    | 10   | -0.72   | 26   | 0.59    | 11   | 0.95    | 6    |

|    |       |    |       |    |       |    |       |    |
|----|-------|----|-------|----|-------|----|-------|----|
| 25 | −0.15 | 19 | 1.58  | 4  | −0.15 | 22 | 0.49  | 15 |
| 26 | −1.89 | 36 | 1.22  | 5  | −0.86 | 27 | −0.54 | 26 |
| 27 | −0.22 | 22 | −0.19 | 19 | 0.37  | 16 | 0.32  | 20 |
| 28 | −0.19 | 20 | −0.8  | 28 | −1.04 | 33 | 0.44  | 16 |
| 29 | −0.2  | 21 | −0.89 | 31 | −0.74 | 26 | −0.23 | 24 |
| 30 | −0.49 | 26 | 0.68  | 11 | −1.02 | 32 | −1.37 | 33 |
| 31 | 0.16  | 14 | −0.84 | 30 | 0.11  | 18 | 0.49  | 14 |
| 32 | −0.23 | 23 | −0.99 | 32 | −0.92 | 29 | −0.09 | 23 |
| 33 | 1.23  | 6  | −0.47 | 23 | 0.58  | 12 | −0.34 | 25 |
| 34 | −0.01 | 17 | −0.74 | 27 | −0.42 | 25 | 0.63  | 12 |
| 35 | −1.4  | 34 | −0.83 | 29 | −1.01 | 31 | −1.56 | 35 |
| 36 | −0.86 | 31 | 0.25  | 14 | −0.91 | 28 | −1.6  | 36 |
| 37 | −0.33 | 24 | 0.24  | 15 | 0.04  | 20 | 1.62  | 1  |
